# Supplementary material
Source: publisher figshare collection journal article supplement (https://tandf.figshare.com/ndownloader/files/17991470)
Supplement: Supplementary file 1 [file 17991470]

**Supplementary data**

**Removal of methylene blue by new tunable aryl/alkyl ionic liquids/salts (TAAILs) from aqueous solution**

**Melek Canbulat Özdemir***

*Corresponding author: Melek Canbulat Özdemir, 1Department of Environmental Engineering, Faculty of Engineering, Middle East Technical University, 06800, Ankara, Turkey. Fax : +90 312 2102646. E-mail address : [ozmelek@metu.edu.tr](mailto:ozmelek@metu.edu.tr)

**Table of Contents**

**(37 Pages)**

The full characterization data and the copies of 1H NMR and 13C NMR spectra of 1-aryl-2-alkyl-3,5-dimethylpyrazolium methanesulfonate salts (2a-2d, 3a-3d)………………………………………………… S1-S13

The full characterization data and the copies 1H NMR, 13C NMR, 19F NMR spectra, and TG/DTA curves of 1-aryl-2-alkyl-3,5-dimethylpyrazolium hexafluorophosphate salts (4a-4d, 5a-5d)……………………………….S13- S34

Calibration curve of Methylene Blue……….……………………………………………………………………S35

Effect of equilibration time on the removal of MB from aqueous solution……………………………………...S35

Chemical name, source, CAS-number and purity of substances…………………………………………………S36

The extraction efficiency of MB from aqueous solution using synthesized TAAILs…………………………….S37

**1-(4-chlorophenyl)-2-ethyl-3,5-dimethylpyrazolium methanesulfonate (2a)**

IR (ATR) *ν* = 3058, 2984, 1649, 1560, 1490, 1418, 1212, 1169, 1090, 1038, 857, 769, 714. 1H NMR (300 MHz, CDCl3, 25 °C, TMS): *δ =* 1.16 (t, *J* = 7.1 Hz, 3H, -NCH2CH3), 2.20 (s, 3H, 5-CH3), 2.60 (s, 3H, 3-CH3), 2.67 (s, 3H, S-CH3), 4.28 (q, *J* = 7.1 Hz, 2H, -NCH2CH3), 6.55 (s, 1H, CH), 7.65 (d, *J* = 8.7 Hz, 2H, Ph), 7.70 (d, *J* =8.7 Hz, 2H, Ph). 13C NMR (75 MHz, CDCl3): *δ* = 12.24, 12.36, 14.37, 39.36, 43.38, 108.81, 129.63, 130.74, 131.11, 139.04, 147.41 and 147.94. Yield: (1.37 g) 83 %, yellow viscous liquid.

**1H-NMR spectrum of 1-(4-chlorophenyl)-2-ethyl-3,5-dimethylpyrazolium methanesulfonate (CDCl3)**

**13C-NMR spectrum of 1-(4-chlorophenyl)-2-ethyl-3,5-dimethylpyrazolium methanesulfonate (CDCl3)**

**1-(4-bromophenyl)-2-ethyl-3,5-dimethylpyrazolium methanesulfonate (2b)**

M. p. 76.3 °C. IR (ATR) *ν* = 3091, 2988, 1660, 1561, 1490, 1417, 1220, 1157, 1037, 772, 710. 1H NMR (300 MHz, DMSO-d6, 25 °C, TMS): *δ* = 1.10 (t, *J* = 7.2 Hz, 3H, -NCH2CH3), 2.18 (s, 3H, 5-CH3), 2.35 (s, 3H, 3-CH3), 2.56 (s, 3H, S-CH3), 4.13 (q, *J* = 7.2 Hz, 2H, -NCH2CH3), 6.83 (s, 1H, CH), 7.73 (d, *J* = 8.7 Hz, 2H, Ph), 7.96 (d, *J* = 8.7 Hz, 2H, Ph). 13C NMR (75 MHz, DMSO-d6): *δ* = 11.81, 12.27, 14.30, 39.98, 43.04, 108.71, 126.65, 130.82, 131.66, 134.14, 147.66 and 148.0. Yield: (1.59 g) 85 %, orange solid.

**1H-NMR spectrum of 1-(4-bromophenyl)-2-ethyl-3,5-dimethylpyrazolium methanesulfonate DMSO-d6)**

**13C-NMR spectrum of 1-(4-bromophenyl)-2-ethyl-3,5-dimethylpyrazolium methanesulfonate (DMSO-d6)**

**2-ethyl-1-(4-methylphenyl)-3,5-dimethylpyrazolium methanesulfonate (2c)**

IR (ATR) *ν* = 3097, 2985, 1654, 1560, 1483, 1418, 1209, 1175, 1037, 767, 716.1H NMR (300 MHz, DMSO-d6, 25 °C, TMS): *δ* = 1.09 (t, *J* = 7.3 Hz, 3H, -NCH2CH3), 2.16 (s, 3H, 5-CH3), 2.38 (s, 3H, 3-CH3), 2.45 (s, 3H, PhCH3), 2.55 (s, 3H, S-CH3), 4.10 (q, *J* = 7.3 Hz, 2H, -NCH2CH3), 6.82 (s, 1H, CH), 7.53 (d, *J* = 8.5 Hz, 2H, Ph), 7.61 (d, *J* =8.5 Hz, 2H, Ph). 13C NMR (75 MHz, DMSO-d6): *δ* = 11.79, 12.28, 14.30, 21.39, 40.15, 42.87, 108.46, 129.0, 129.18, 131.47, 143.15, 147.16 and 147.79. Yield: (1.35 g) 87 %, yellow viscous liquid.

**1H-NMR spectrum of 2-ethyl-1-(4-methylphenyl)-3,5-dimethylpyrazolium methanesulfonate (DMSO-d6)**

**13C-NMR spectrum of 2-ethyl-1-(4-methylphenyl)-3,5-dimethylpyrazolium methanesulfonate (DMSO-d6)**

**2-ethyl-1-(4-methoxyphenyl)-3,5-dimethylpyrazolium methanesulfonate (2d)**

IR (ATR) *ν* = 3106, 2987, 1648, 1509, 1461, 1418, 1257, 1213, 1170, 1039, 773, 655.1H NMR (300 MHz, DMSO-d6, 25 °C, TMS): *δ* = 1.10 (t, *J* =7.2 Hz, 3H, -NCH2CH3), 2.16 (s, 3H, 5-CH3), 2.38 (s, 3H, 3-CH3), 2.55 (s, 3H, S-CH3), 3.88 (s, 3H, PhOCH3), 4.10 (q, *J* = 7.2 Hz, 2H, -NCH2CH3), 6.80 (s, 1H, CH), 7.25 (d, *J* = 9.0 Hz, 2H, Ph,), 7.65 (d, *J* = 9.0 Hz, 2H, Ph).13C NMR (75 MHz, DMSO-d6): *δ* =11.80, 12.28, 14.30, 40.13, 42.74, 56.30, 108.30, 116.06, 123.73, 131.01, 146.94, 147.93 and 162.17. Yield: (1.55 g) 95 %, light brown viscous liquid.

**1H-NMR spectrum of 2-ethyl-1-(4-methoxyphenyl)-3,5-dimethylpyrazolium methanesulfonate (DMSO-d6)**

**13C-NMR spectrum of 2-ethyl-1-(4-methoxyphenyl)-3,5-dimethylpyrazolium methanesulfonate (DMSO-d6)**

**2-butyl-1-(4-chlorophenyl)-3,5-dimethylpyrazolium methanesulfonate (3a)**

IR (ATR) *ν* = 3057, 2963, 1659, 1560, 1491, 1418, 1191, 1038, 768, 751. 1H NMR (300 MHz, DMSO-d6, 25 °C, TMS): *δ* = 0.69 (t, *J* = 7.3 Hz, 3H, -NCH2CH2CH2CH3), 1.11 (m, 2H, -NCH2CH2CH2CH3), 1.43 (m, 2H, -NCH2CH2CH2CH3), 2.19 (s, 3H, 5-CH3), 2.33 (s, 3H, 3-CH3), 2.56 (s, 3H, S-CH3), 4.10 (t, *J* = 7.6 Hz, 2H, -NCH2CH2CH2CH3), 6.85 (s, 1H, CH), 7.84 (s, 4H, Ph). 13C NMR (75 MHz, DMSO-d6): *δ* = 12.05, 12.29, 13.47, 19.13, 30.43, 40.12, 47.23, 108.74, 130.46, 131.09, 131.56, 137.66, 148.11 and 148.14. Yield: (1.49 g) 83 %, yellow viscous liquid.

**1H-NMR spectrum of 2-butyl-1-(4-chlorophenyl)-3,5-dimethylpyrazolium methanesulfonate (DMSO-d6)**

**13C-NMR spectrum of 2-butyl-1-(4-chlorophenyl)-3,5-dimethylpyrazolium methanesulfonate (DMSO-d6)**

**1-(4-bromophenyl)-2-butyl-3,5-dimethylpyrazolium methanesulfonate (3b)**

IR (ATR) *ν* = 3055, 2962, 1647, 1560, 1488, 1417, 1190, 1038, 767, 712. 1H NMR (300 MHz, DMSO-d6, 25 °C, TMS): *δ* = 0.7 (t, *J* = 7.3 Hz, 3H, -NCH2CH2CH2CH3), 1.10 (m, 2H, -NCH2CH2CH2CH3), 1.42 (m, 2H, -NCH2CH2CH2CH3), 2.19 (s, 3H, 5-CH3), 2.32 (s, 3H, 3-CH3), 2.56 (s, 3H, S-CH3), 4.10 (t, *J* = 7.6 Hz, 2H, -NCH2CH2CH2CH3), 6.84 (s, 1H, CH), 7.74 (d, *J* = 8.6 Hz, 2H, Ph,), 7.97 (d, *J* = 8.6 Hz, 2H, Ph,). 13C NMR (75 MHz, DMSO-d6): *δ* = 12.06, 12.31, 13.49, 19.14, 30.45, 40.15, 47.24, 108.75, 126.51, 130.89, 131.70, 134.07, 148.09 and 148.15. Yield: (1.61 g) 80 %, yellow viscous liquid.

**1H-NMR spectrum of 1-(4-bromophenyl)-2-butyl-3,5-dimethylpyrazolium methanesulfonate (DMSO-d6)**

**13C-NMR spectrum of 1-(4-bromophenyl)-2-butyl-3,5-dimethylpyrazolium methanesulfonate (DMSO-d6)**

**2-butyl-1-(4-methylphenyl)-3,5-dimethylpyrazolium methanesulfonate (3c)**

IR (ATR) *ν* = 3060, 2962, 1650, 1560, 1511, 1462, 1419, 1191, 1038, 766, 716. 1H NMR (300 MHz, CDCl3, 25 °C, TMS): *δ* = 0.78 (t, *J* = 7.3 Hz, 3H, -NCH2CH2CH2CH3), 1.18 (m, 2H, -NCH2CH2CH2CH3), 1.48 (m, 2H,-NCH2CH2CH2CH3), 2.22 (s, 3H, 5-CH3), 2.49 (s, 3H, 3-CH3), 2.65 (s, 3H, PhCH3), 2.74 (s, 3H, S-CH3), 4.27 (t, *J* = 7.6 Hz, 2H, -NCH2CH2CH2CH3), 6.53 (s, 1H, CH), 7.45 (d, *J* = 8.2 Hz, 2H, Ph), 7.55 (d, *J* = 8.2 Hz, 2H, Ph). 13C NMR (75 MHz, CDCl3): *δ* = 11.79, 12.26, 13.12, 19.24, 21.34, 30.81, 39.24, 47.42, 108.47, 128.37, 128.52, 131.24, 143.25, 147.28 and 147.51. Yield: (1.39 g) 82 %, orange viscous liquid.

**1H-NMR spectrum of 2-butyl-1-(4-methylphenyl)-3,5-dimethylpyrazolium methanesulfonate (CDCl3)**

**13C-NMR spectrum of 2-butyl-1-(4-methylphenyl)-3,5-dimethylpyrazolium methanesulfonate (CDCl3)**

**2-butyl-1-(4-methoxyphenyl)-3,5-dimethylpyrazolium methanesulfonate (3d)**

IR (ATR) *ν* = 3063, 2962, 1648, 1560, 1509, 1463, 1418, 1171, 1038, 767, 648. 1H NMR (300 MHz, DMSO-d6, 25 °C, TMS): *δ* = 0.69 (t, *J* = 7.3 Hz, 3H, -NCH2CH2CH2CH3), 1.10 (m, 2H, -NCH2CH2CH2CH3), 1.45 (m, 2H, -NCH2CH2CH2CH3), 2.17 (s, 3H, 5-CH3), 2.34 (s, 3H, 3-CH3), 2.55 (s, 3H, S-CH3), 3.88 (s, 3H, PhOCH3), 4.07 (t, *J* = 7.6 Hz, 2H, -NCH2CH2CH2CH3), 6.81 (s, 1H, CH), 7.25 (d, *J* = 8.9 Hz, 2H, Ph), 7.66 (d, *J* = 8.9 Hz, 2H, Ph). 13C NMR (75 MHz, DMSO-d6): *δ* = 12.03, 12.31, 13.48, 19.17, 30.45, 40.12, 46.95, 56.31, 108.32, 115.98, 123.81, 131.04, 147.37, 147.99 and 162.14. Yield: (1.56 g) 88 %, light brown viscous liquid.

**1H-NMR spectrum of 2-butyl-1-(4-methoxyphenyl)-3,5-dimethylpyrazolium methanesulfonate (DMSO-d6)**

**13C-NMR spectrum of 2-butyl-1-(4-methoxyphenyl)-3,5-dimethylpyrazolium methanesulfonate (DMSO-d6)**

**1-(4-chlorophenyl)-2-ethyl-3,5-dimethylpyrazolium hexafluorophosphate (4a)**

M. p. 120.5 °C. IR (ATR) *ν* = 3107, 2989-2884, 1557, 1489, 1416, 1092, 834, 556. 1H NMR (300 MHz, DMSO-d6, 25 °C, TMS): *δ* = 1.10 (t, *J* = 7.2 Hz, 3H, -NCH2CH3), 2.18 (s, 3H, 5-CH3), 2.56 (s, 3H ,3-CH3), 4.12 (q, *J* = 7.2 Hz, 2H,-NCH2CH3), 6.82 (s, 1H, CH), 7.79 (d, *J* = 8.9 Hz, 2H,Ph,), 7.84 (d, *J* =8.9 Hz, 2H, Ph). 13C NMR (75 MHz, DMSO-d6): *δ* = 11.70, 12.18, 14.24, 43.00, 108.65, 130.36, 131.20, 131.42, 137.88, 147.64 and 148.09. 19F NMR (282 MHz, DMSO-d6): *δ* = -68.87, -71.39. Anal. calcd. for [C13H16ClN2]PF6: C 41.01, H 4.24, N 7.36; found: C 41.07, H 4.26, N 7.39. Yield: ( 1.59 g) 84 %, white solid. Water and residual solvent content by TG/DTA between 40-100 °C: 0.178 %.

**1H-NMR spectrum of 1-(4-chlorophenyl)-2-ethyl-3,5-dimethylpyrazolium hexafluorophosphate (DMSO-d6)**

**13C-NMR spectrum of 1-(4-chlorophenyl)-2-ethyl-3,5-dimethylpyrazolium hexafluorophosphate (DMSO-d6)**

**19F-NMR spectrum of 1-(4-chlorophenyl)-2-ethyl-3,5-dimethylpyrazolium hexafluorophosphate (DMSO-d6)**

**TG/DTA curves of 1-(4-chlorophenyl)-2-ethyl-3,5-dimethylpyrazolium hexafluorophosphate**

**1-(4-bromophenyl)-2-ethyl-3,5-dimethylpyrazolium hexafluorophosphate (4b)**

M. p. 151.3 °C. IR (ATR) *ν* = 3159, 2980-2941, 1564, 1489, 1411, 1072, 1012, 835, 555. 1H NMR (300 MHz, DMSO-d6, 25 °C, TMS): *δ* =1.10 (t, *J* =7.2 Hz, 3H, -NCH2CH3), 2.18 (s, 3H, 5-CH3), 2.56 (s, 3H, 3-CH3), 4.12 (q, *J* = 7.2 Hz, 2H, -NCH2CH3), 6.81 (s, 1H, CH), 7.73 (d, *J* = 8.6 Hz, 2H, Ph), 7.79 (d, *J* = 8.6 Hz, 2H, Ph). 13C NMR (75 MHz, DMSO-d6): *δ* = 11.68, 12.16, 14.22, 43.01, 108.68, 126.72, 130.79, 131.56, 134.17, 147.69 and 148.05. 19F NMR (282 MHz, DMSO-d6): *δ* = -68.87, -71.39. Anal. calcd. for [C13H16BrN2]PF6: C 36.73, H 3.79, N 6.59; found: C 36.71, H 3.77, N 6.61. Yield: (1.70 g) 80%, beige solid. Water and residual solvent content by TG/DTA between 40-100 °C: 0.107 %.

**1H-NMR spectrum of 1-(4-bromophenyl)-2-ethyl-3,5-dimethylpyrazolium hexafluorophosphate (DMSO-d6)**

**13C-NMR spectrum of 1-(4-bromophenyl)-2-ethyl-3,5-dimethylpyrazolium hexafluorophosphate (DMSO-d6)**

**19F-NMR spectrum of 1-(4-bromophenyl)-2-ethyl-3,5-dimethylpyrazolium hexafluorophosphate (DMSO-d6)**

**TG/DTA curves of 1-(4-bromophenyl)-2-ethyl-3,5-dimethylpyrazolium hexafluorophosphate**

**2-ethyl-1-(4-methylphenyl)-3,5-dimethylpyrazolium hexafluorophosphate (4c)**

M. p. 108.4 °C. IR (ATR) *ν* = 3146, 2947, 1560, 1511, 1485, 1419, 831, 556. 1H NMR (300 MHz, DMSO-d6, 25 °C, TMS): *δ* = 1.10 (t, *J* = 7.2 Hz, 3H, -NCH2CH3), 2.16 (s, 3H, 5-CH3), 2.47 (s, 3H, PhCH3), 2.55 (s, 3H, 3-CH3), 4.10 (q, *J* = 7.2 Hz, 2H, -NCH2CH3), 6.80 (s, 1H, CH), 7.54 (d, *J* = 8.5 Hz, 2H, Ph), 7.60 (d, *J* = 8.5 Hz, 2H, Ph). 13C NMR (75 MHz, DMSO-d6): *δ* = 11.68, 12.19, 14.24, 21.33, 42.84, 108.42, 128.98, 129.13, 131.49, 143.24, 147.16 and 147.84. 19F NMR (282 MHz, DMSO-d6): *δ* = -68.89, -71.41. Anal. calcd. for [C14H19N2]PF6: C 46.67, H 5.32, N 7.78; found: C 46.65, H 5.30, N 7.80. Yield: (1.57 g) 87 %, beige solid. Water and residual solvent content by TG/DTA between 40-100 °C: 0.053 %.

**1H-NMR spectrum of 2-ethyl-1-(4-methylphenyl)-3,5-dimethylpyrazolium hexafluorophosphate (DMSO-d6)**

**13C-NMR spectrum of 2-ethyl-1-(4-methylphenyl)-3,5-dimethylpyrazolium hexafluorophosphate (DMSO-d6)**

**19F-NMR spectrum of 2-ethyl-1-(4-methylphenyl)-3,5-dimethylpyrazolium hexafluorophosphate (DMSO-d6)**

**TG/DTA curves of 2-ethyl-1-(4-methylphenyl)-3,5-dimethylpyrazolium hexafluorophosphate**

**2-ethyl-1-(4-methoxyphenyl)-3,5-dimethylpyrazolium hexafluorophosphate (4d)**

M. p. 145.6 °C. IR (ATR) *ν* = 3155, 2984-2943, 1603, 1561, 1507, 1482, 1255, 1173, 1022, 836, 556. 1H NMR (300 MHz, DMSO-d6, 25 °C, TMS): *δ* = 1.10 (t, *J* = 7.2 Hz, 3H, -NCH2CH3), 2.15 (s, 3H, 5-CH3), 2.54 (s, 3H, 3-CH3), 3.88 (s, 3H, PhOCH3) 4.07 (q, *J* = 7.2 Hz, 2H, -NCH2CH3), 6.78 (s, 1H, CH), 7.24 (d, *J* = 8.9 Hz, 2H, Ph), 7.64 (d, *J* = 8.9 Hz, 2H, Ph). 13C NMR (75 MHz, DMSO-d6): *δ* = 11.65, 12.16, 14.22, 42.69, 56.20, 108.25, 116.05, 123.71, 130.93, 146.94, 148.00 and 162.24. 19F NMR (282 MHz, DMSO-d6): *δ* = -68.88, -71.40. Anal. calcd. for [C14H19N2O]PF6: C 44.69, H 5.09, N 7.44; found: C 44.51, H 5.11, N 7.47. Yield: (1.67 g) 89 %, white solid. Water and residual solvent content by TG/DTA between 40-100 °C: 0.373 %.

**1H-NMR spectrum of 2-ethyl-1-(4-methoxyphenyl)-3,5-dimethylpyrazolium hexafluorophosphate (DMSO-d6)**

**13C-NMR spectrum of 2-ethyl-1-(4-methoxyphenyl)-3,5-dimethylpyrazolium hexafluorophosphate (DMSO-d6)**

**19F-NMR spectrum of 2-ethyl-1-(4-methoxyphenyl)-3,5-dimethylpyrazolium hexafluorophosphate (DMSO-d6)**

**TG/DTA curves of 2-ethyl-1-(4-methoxyphenyl)-3,5-dimethylpyrazolium hexafluorophosphate**

**2-butyl-1-(4-chlorophenyl)-3,5-dimethylpyrazolium hexafluorophosphate (5a)**

M. p. 101.9 °C. IR (ATR) *ν* = 3158, 2962-2879, 1563, 1493, 1416, 1093, 822, 556. 1H NMR (300 MHz, DMSO-d6, 25 °C, TMS): *δ* = 0.71 (t, *J* =7.3 Hz, 3H, -NCH2CH2CH2CH3), 1.12 (m, 2H, -NCH2CH2CH2CH3), 1.43 (m, 2H, -NCH2CH2CH2CH3), 2.19 (s, 3H, 5-CH3), 2.56 (s, 3H, 3-CH3), 4.09 (t, *J* = 7.6 Hz, 2H, -NCH2CH2CH2CH3), 6.82 (s, 1H, CH), 7.79 (d, *J* = 9.0 Hz 2H,Ph), 7.85 (d, *J* = 9.0 Hz, 2H, Ph). 13C NMR (75 MHz, DMSO-d6): *δ* = 11.91, 12.21, 13.42, 19.12, 30.48, 47.17, 108.64, 130.41, 131.13, 131.41, 137.83, 148.07, 148.21. 19F NMR (282 MHz, DMSO-d6): *δ* = -68.89, -71.41. Anal. calcd for [C15H20ClN2]PF6: C 44.08, H 4.93, N 6.85; found: C 43.95, H 4.95, N 6.81. Yield: (1.74 g) 85 %, white solid. Water and residual solvent content by TG/DTA between 40-100 °C: 0.380 %.

**1H-NMR spectrum of 2-butyl-1-(4-chlorophenyl)-3,5-dimethylpyrazolium hexafluorophosphate (DMSO-d6)**

**13C-NMR spectrum of 2-butyl-1-(4-chlorophenyl)-3,5-dimethylpyrazolium hexafluorophosphate (DMSO-d6)**

**19F-NMR spectrum of 2-butyl-1-(4-chlorophenyl)-3,5-dimethylpyrazolium hexafluorophosphate (DMSO-d6)**

**TG/DTA curves of 2-butyl-1-(4-chlorophenyl)-3,5-dimethylpyrazolium hexafluorophosphate**

**1-(4-bromophenyl)-2-butyl-3,5-dimethylpyrazolium hexafluorophosphate (5b)**

M. p. 132.3 °C. IR (ATR) *ν* = 3154, 2969-2877, 1558, 1489, 1415, 1072, 837, 556. 1H NMR (300 MHz, DMSO-d6, 25 °C, TMS): *δ* = 0.71 (t, *J* = 7.3 Hz, 3H, -NCH2CH2CH2CH3), 1.12 (m, 2H, -NCH2CH2CH2CH3), 1.43 (m, 2H, -NCH2CH2CH2CH3), 2.19 (s, 3H, 5-CH3), 2.55 (s, 3H, 3-CH3), 4.09 (t, *J* = 7.6 Hz, 2H, -NCH2CH2CH2CH3), 6.82 (s, 1H, CH), 7.72 (d, *J* = 8.7 Hz, 2H, Ph), 7.97 (d, *J* =8.7 Hz, 2H, Ph). 13C NMR (75 MHz, DMSO-d6): *δ* = 11.95, 12.25, 13.47, 19.13, 30.50, 47.18, 108.66, 126.64, 130.86, 131.57, 134.11, 148.08, 148.17. 19F NMR (282 MHz, DMSO-d6): *δ* = -68.88, -71.40. Anal. calcd for [C15H20BrN2]PF6: C 39.75, H 4.45, N 6.18; found: C 39.59, H 4.48, N 6.16. Yield: (1.86 g) 82%, white solid. Water and residual solvent content by TG/DTA between 40-100 °C: 0.233 %.

**1H-NMR spectrum of 1-(4-bromophenyl)-2-butyl-3,5-dimethylpyrazolium hexafluorophosphate (DMSO-d6)**

**13C-NMR spectrum of 1-(4-bromophenyl)-2-butyl-3,5-dimethylpyrazolium hexafluorophosphate (DMSO-d6)**

**19F-NMR spectrum of 1-(4-bromophenyl)-2-butyl-3,5-dimethylpyrazolium hexafluorophosphate (DMSO-d6)**

**TG/DTA curves of 1-(4-bromophenyl)-2-butyl-3,5-dimethylpyrazolium hexafluorophosphate**

**2-butyl-1-(4-methylphenyl)-3,5-dimethylpyrazolium hexafluorophosphate (5c)**

M. p. 100.7 °C. IR (ATR) *ν* = 3157, 2960-2879, 1562, 1510, 1482, 1417, 1322, 1210, 1036, 828, 556. 1H NMR (300 MHz, DMSO-d6, 25 °C, TMS): *δ* = 0.70 (t, *J* = 7.3 Hz, 3H,-NCH2CH2CH2CH3), 1.10 (m, 2H, -NCH2CH2CH2CH3), 1.44 (m, 2H, -NCH2CH2CH2CH3), 2.17 (s, 3H, 5-CH3), 2.46 (s, 3H, PhCH3), 2.55 (s, 3H, 3-CH3), 4.07 (t, *J* = 7.6 Hz, 2H,-NCH2CH2CH2CH3), 6.80 (s, 1H, CH), 7.54 (d, *J* = 8.4 Hz, 2H, Ph), 7.60 (d, *J* = 8.4 Hz, 2H, Ph). 13C NMR (75 MHz, DMSO-d6): *δ* = 11.95, 12.28, 13.46, 19.13, 21.35, 30.46, 47.02, 108.40, 129.01, 129.13, 131.40, 143.13, 147.52, 147.93. 19F NMR (282 MHz, DMSO-d6): *δ* = -68.91, -71.43. Anal. calcd for [C16H23N2]PF6: C 49.49, H 5.97, N 7.21; found: C 49.24, H 6.0, N 7.18. Yield: (1.67 g) 86 %, white solid. Water and residual solvent content by TG/DTA between 40-100 °C: 0.069 %.

**1H-NMR spectrum of 2-butyl-1-(4-methylphenyl)-3,5-dimethylpyrazolium hexafluorophosphate (DMSO-d6)**

**13C-NMR spectrum of 2-butyl-1-(4-methylphenyl)-3,5-dimethylpyrazolium hexafluorophosphate (DMSO-d6)**

**19F-NMR spectrum of 2-butyl-1-(4-methylphenyl)-3,5-dimethylpyrazolium hexafluorophosphate (DMSO-d6)**

**TG/DTA curves of 2-butyl-1-(4-methylphenyl)-3,5-dimethylpyrazolium hexafluorophosphate**

**2-butyl-1-(4-methoxyphenyl)-3,5-dimethylpyrazolium hexafluorophosphate (5d)**

M. p. 120.7 °C. IR (ATR) *ν* = 3157, 2965-2879, 1604, 1510, 1474, 1416, 1261, 1173, 1022, 835, 556. 1H NMR (300 MHz, DMSO-d6, 25 °C, TMS): *δ* = 0.71 (t, *J* = 7.3 Hz, 3H,-NCH2CH2CH2CH3), 1.10 (m, 2H, -NCH2CH2CH2CH3), 1.45 (m, 2H, -NCH2CH2CH2CH3), 2.17 (s, 3H, 5-CH3), 2.54 (s, 3H, 3-CH3), 3.89 (s, 3H, PhOCH3), 4.06 (t, *J* = 7.6 Hz, 2H, -NCH2CH2CH2CH3), 6.79 (s, 1H, CH), 7.24 (d, *J* = 9.0 Hz, 2H, Ph), 7.65 (d, *J* = 9.0 Hz, 2H, Ph). 13C NMR (75 MHz, DMSO-d6): *δ* = 11.90, 12.24, 13.43, 19.17, 30.48, 46.90, 56.22, 108.23, 115.98, 123.77, 130.95, 147.31, 148.08, 162.21. 19F NMR (282 MHz, DMSO-d6): *δ* = -68.90, -71.42. Anal. calcd for [C16H23N2O]PF6: C 47.53, H 5.73, N 6.93; found: C 47.28, H 5.76, N 6.90. Yield: (1.78) 88 %, white solid. Water and residual solvent content by TG/DTA between 40-100 °C: 0.309 %.

**1H-NMR spectrum of 2-butyl-1-(4-methoxyphenyl)-3,5-dimethylpyrazolium hexafluorophosphate (DMSO-d6)**

**13C-NMR spectrum of 2-butyl-1-(4-methoxyphenyl)-3,5-dimethylpyrazolium hexafluorophosphate (DMSO-d6)**

**19F-NMR spectrum of 2-butyl-1-(4-methoxyphenyl)-3,5-dimethylpyrazolium hexafluorophosphate (DMSO-d6)**

**TG/DTA curves of 2-butyl-1-(4-methoxyphenyl)-3,5-dimethylpyrazolium hexafluorophosphate**

Supp. Figure 1. Calibration curve of Methylene Blue (2-16 ppm).

Supp. Figure 2. Effect of equilibration time on the removal of MB from aqueous solution.

Supp. Table 1. Chemical name, source, CAS-number and purity of the substances.

| **Chemical Name** | **Source** | **CAS-number** | **Purity (%)** |
| --- | --- | --- | --- |
| Acetic acid (glacial) | Merck | 64-19-7 | 99.8-100.5 |
| Acetylacetone | Merck | 123-54-6 | ≥ 99 |
| Acetonitrile (for gas chromatography) | Merck | 75-05-8 | - |
| 4-Bromophenylhydrazinium hydrochloride (for synthesis) | Merck | 622-88-8 | - |
| n-Butanol (anhydrous) | Sigma-Aldrich | 71-36-3 | 99.8 |
| Dichloromethane | Sigma-Aldrich | 75-09-2 | ≥ 99.8 |
| 4-Chlorophenylhydrazine hydrochloride (for synthesis) | Merck | 1073-70-7 | - |
| Ethyl acetate | Merck | 141-78-6 | ≥ 99.8 |
| Ethyl methanesulfonate | Merck | 62-50-0 | ≥ 99 |
| Ethanol (absolute) | Merck | 64-17-5 | ≥ 99.5 |
| Diethyl ether (anhydrous) | Sigma- Aldrich | 60-29-7 | ≥ 99.7 |
| n-Hexane | Merck | 110-54-3 | ≥ 95 |
| Hydrochloric acid | Sigma- Aldrich | 7647-01-0 | 37 |
| Methanesulfonyl chloride | Sigma- Aldrich | 124-63-0 | ≥ 99.7 |
| Methylene blue | Merck | 61-73-4 | ≥ 82 |
| 4-Methoxyphenylhydrazinium hydrochloride (for synthesis) | Merck | 19501-58-7 | - |
| Potassium hexafluorophosphate | Sigma- Aldrich | 17084-13-8 | 98 |
| p-Tolylhydrazine hydrochloride  (for synthesis) | Merck | 637-60-5 | - |
| Sodium bicarbonate | Sigma- Aldrich | 144-55-8 | ≥ 99.7 |
| Sodium chloride | Merck | 7647-14-5 | ≥ 99.5 |
| Sodium sulfate (anhydrous) | Sigma-Aldrich | 7757-82-6 | 99.0-100.5 |

Supp. Table 2. The extraction efficiency of MB from aqueous solution using synthesized TAAILs.

| **TAAILs** | **Concentration of TAAILs (ppm)** | **Extraction efficiency (%)** | **Mean extraction efficiency (%)** | **Standard Deviation** |
| --- | --- | --- | --- | --- |
| **4a** | 20 | 96.2; 95.9 | 96.1 | ± 0.2 |
| 100 | 99.5; 99.9 | 99.7 | ± 0.3 |
| **4b** | 20 | 95.0; 94.5 | 94.8 | ± 0.4 |
| 100 | 98.2; 98.7 | 98.5 | ± 0.4 |
| **4c** | 20 | 93.5; 94.1 | 93.8 | ± 0.4 |
| 100 | 98.6; 98.2 | 98.4 | ± 0.3 |
| **4d** | 20 | 96.1; 95.6 | 95.9 | ± 0.4 |
| 100 | 99.7; 99.3 | 99.5 | ± 0.3 |
| **5a** | 20 | 88.0; 88.5 | 88.3 | ± 0.4 |
| 100 | 96.8; 96.2 | 96.5 | ± 0.4 |
| **5b** | 20 | 83.1;82.8 | 83.0 | ± 0.2 |
| 100 | 93.6; 93.8 | 93.7 | ± 0.1 |
| **5c** | 20 | 73.7; 73.2 | 73.5 | ± 0.4 |
| 100 | 87.8; 87.3 | 87.6 | ± 0.4 |
| **5d** | 20 | 83.3; 83.0 | 83.2 | ± 0.2 |
| 100 | 94.3; 94.4 | 94.4 | ± 0.1 |
